# Supplementary material for: Introducing visible-light sensitivity into photocatalytic CeO2 nanoparticles by hybrid particle preparation exploiting plasmonic properties of gold: enhanced photoelectrocatalysis exemplified for hydrogen peroxide sensing
Source: Royal Society of Chemistry journal article supplement (doi:10.1039/d0nr06356h), 2020-12-08
Supplement: d0nr06356h1.pdf [file d0nr06356h1.pdf]

## Supporting Information

### **Introducing visible-light sensitivity into photocatalytic CeO<sub>2</sub> nanoparticles by hybrid particle preparation exploiting plasmonic properties of gold: Enhanced photoelectrocatalysis exemplified for hydrogen peroxide sensing**

Shuang Zhao<sup>1</sup>, Marc Riedel<sup>2</sup>, Javier Patarroyo<sup>3</sup>, Neus Bastus<sup>3</sup>, Victor Puntès<sup>3,4,5</sup>, Zhao Yue<sup>6\*</sup>, Fred Lisdat<sup>2\*</sup>, Wolfgang J. Parak<sup>1,7\*</sup>

<sup>1</sup>Fachbereich Physik, CHyN, Universität Hamburg, 22761, Hamburg, Germany

<sup>2</sup>Biosystems Technology, Institute of Life Sciences and Biomedical Technologies, Technical University of Applied Sciences Wildau, 15745, Wildau, Germany

<sup>3</sup>Institut Català de Nanociència i Nanotecnologia (ICN2), CSIC and BIST, Campus UAB, Bellaterra, 08193, Barcelona, Catalonia, Spain

<sup>4</sup>Vall d'Hebron Institut de Recerca (VHIR), 08035, Barcelona, Catalonia, Spain

<sup>5</sup>ICREA, Pg. Lluís Companys 23, 08010, Barcelona, Catalonia, Spain

<sup>6</sup>Department of Microelectronics, Nankai University, 30071, Tianjin, China

<sup>7</sup>CIC Biomagune, 20014, San Sebastian, Spain

\*corresponding authors: yuezhao@nankai.edu.cn, flisdat@th-wildau.de, wolfgang.parak@uni-hamburg.de

- I) Synthesis and characterization of nanoparticles
- II) Characterization of nanoparticle deposition in a flow system with quartz crystal microbalance measurements
- III) Characterization of nanoparticle deposition in a batch mode with UV/VIS absorption spectroscopy
- IV) Characterization of nanoparticle deposition in multiple layers with UV/VIS absorption spectroscopy
- V) Description of the used experimental set-up for measuring photocurrents
- VI) Photocurrent measurements
- VII) Stability and interference measurements
- VIII) References

## I) Synthesis and characterization of nanoparticles

*Materials for nanoparticle (NP) synthesis:* Cerium(III) nitrate hexahydrate (99% trace metals basis), gold(III) chloride trihydrate (99% trace metals basis), silver nitrate (ACS reagent, >99.8%), potassium carbonate (ACS reagent, >99.0%), sodium citrate tribasic dihydrate (ACS reagent, >99.0%), tannic acid (ACS reagent), hydrogen peroxide (H<sub>2</sub>O<sub>2</sub>), cysteamine, poly(diallyldimethylammonium chloride) solution (PDDA), ascorbic acid, uric acid, dopamine, glucose, NaCl, KCl, and phosphate buffered saline tablets (PBS, pH 7.4 at 25°C) were purchased from Sigma-Aldrich (Steinheim, Germany). HCl and NaOH were obtained from ROTH (Karl Roth, Germany). There was not further purification of the reagents after receiving. Milli-Q water was used for all the aqueous solutions in this work.

*Structural characterization:* Transmission electron microscopy (TEM) images are shown in Figure SI-1 and Figure SI-2. X-ray diffraction (XRD) characterization is presented in Figure SI-4. Further characterization is available in a previous report <sup>1</sup>.

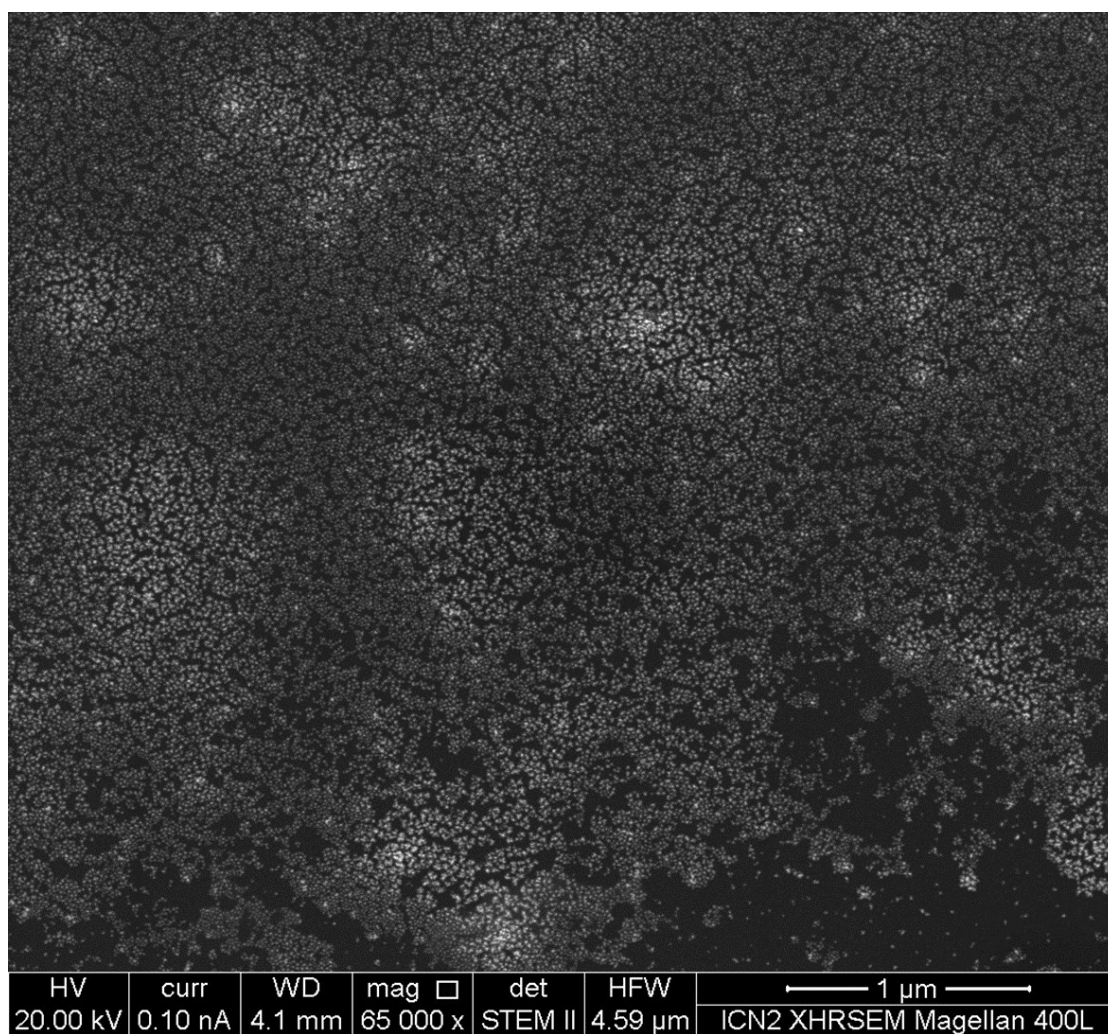

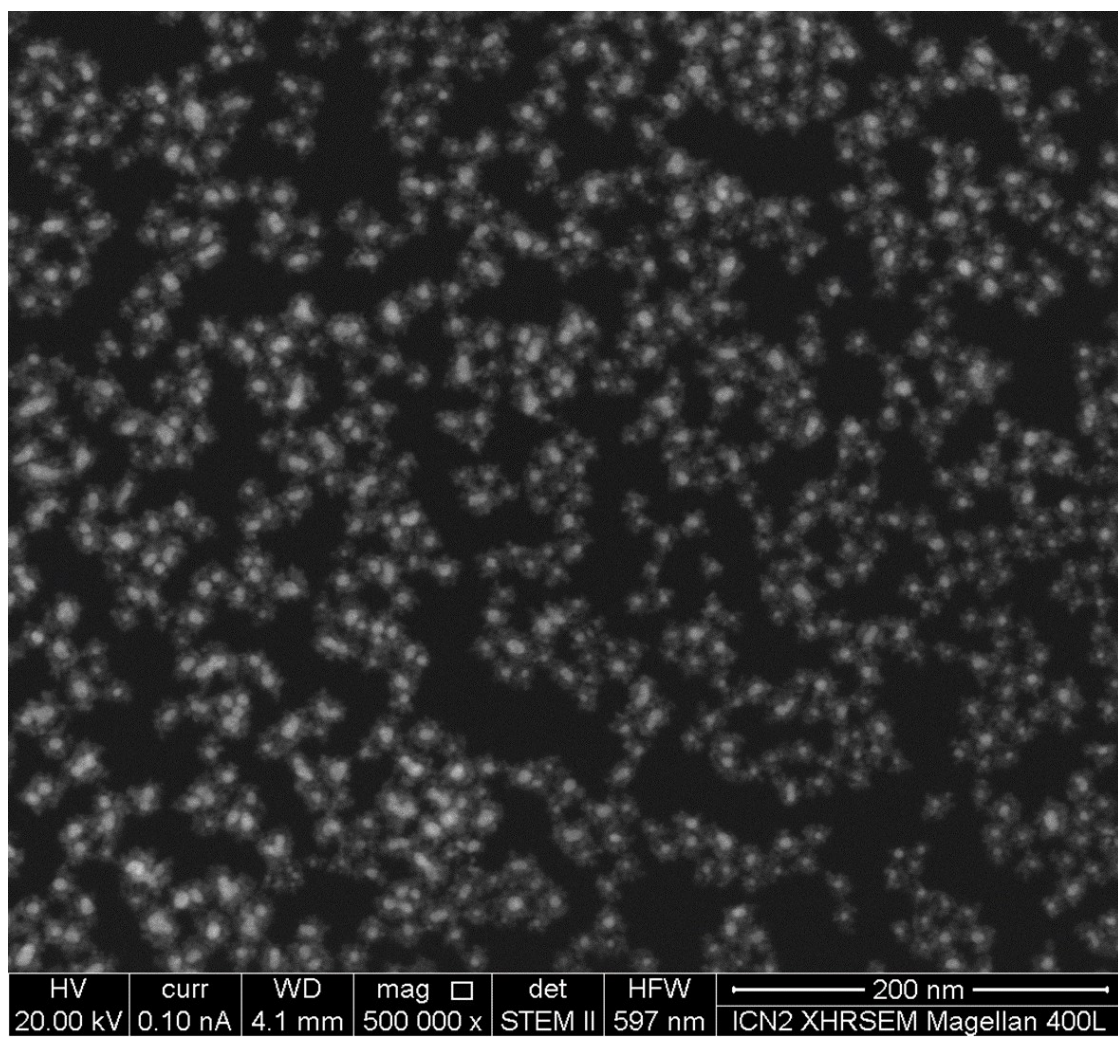

**Figure SI-1:** Representative high-angle annular dark field scanning TEM (HAADF-STEM) images of as-obtained colloidal Au@CeO<sub>2</sub> hybrid NPs, revealing the formation of a core of Au (~5 nm) surrounded by a relatively uniform CeO<sub>2</sub> shell.



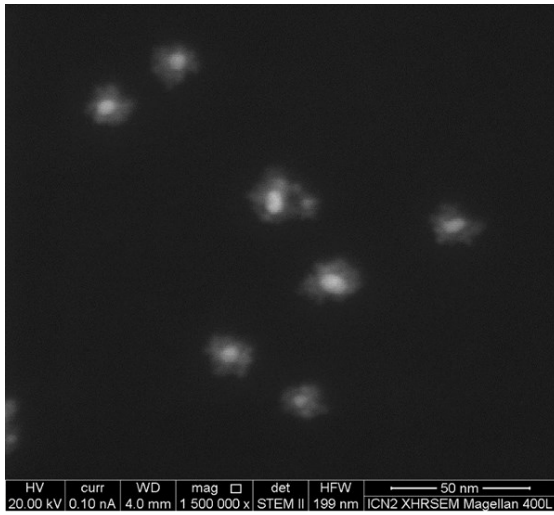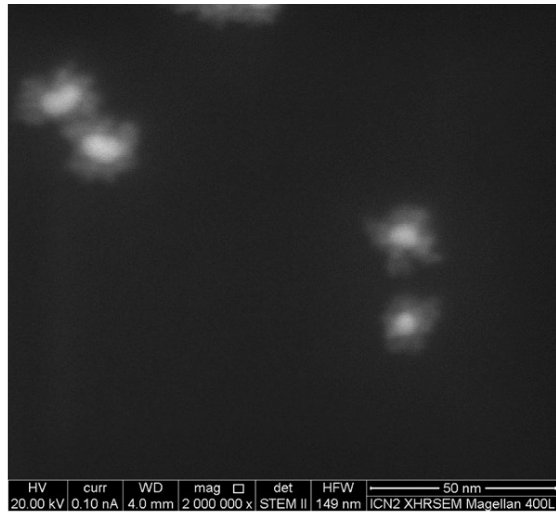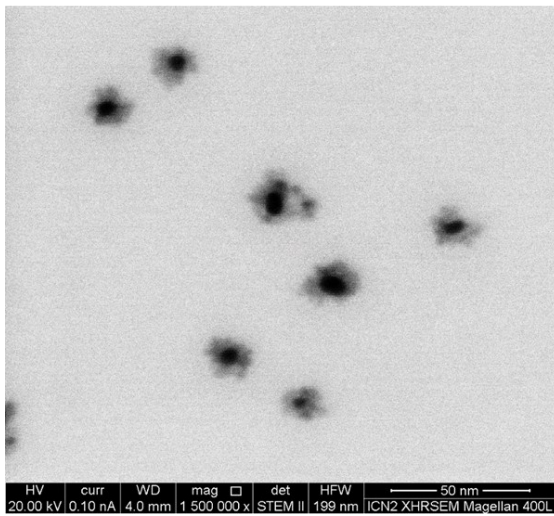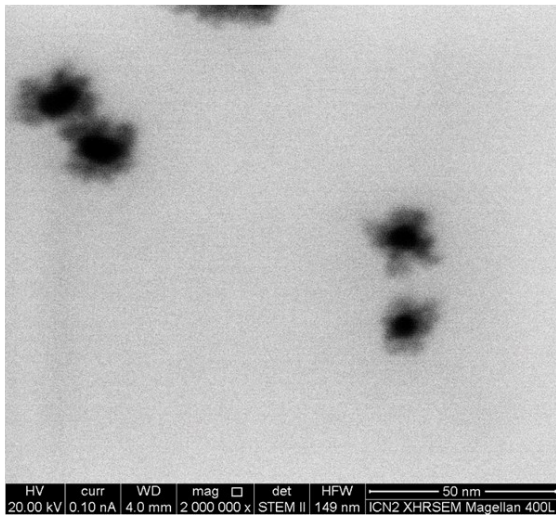

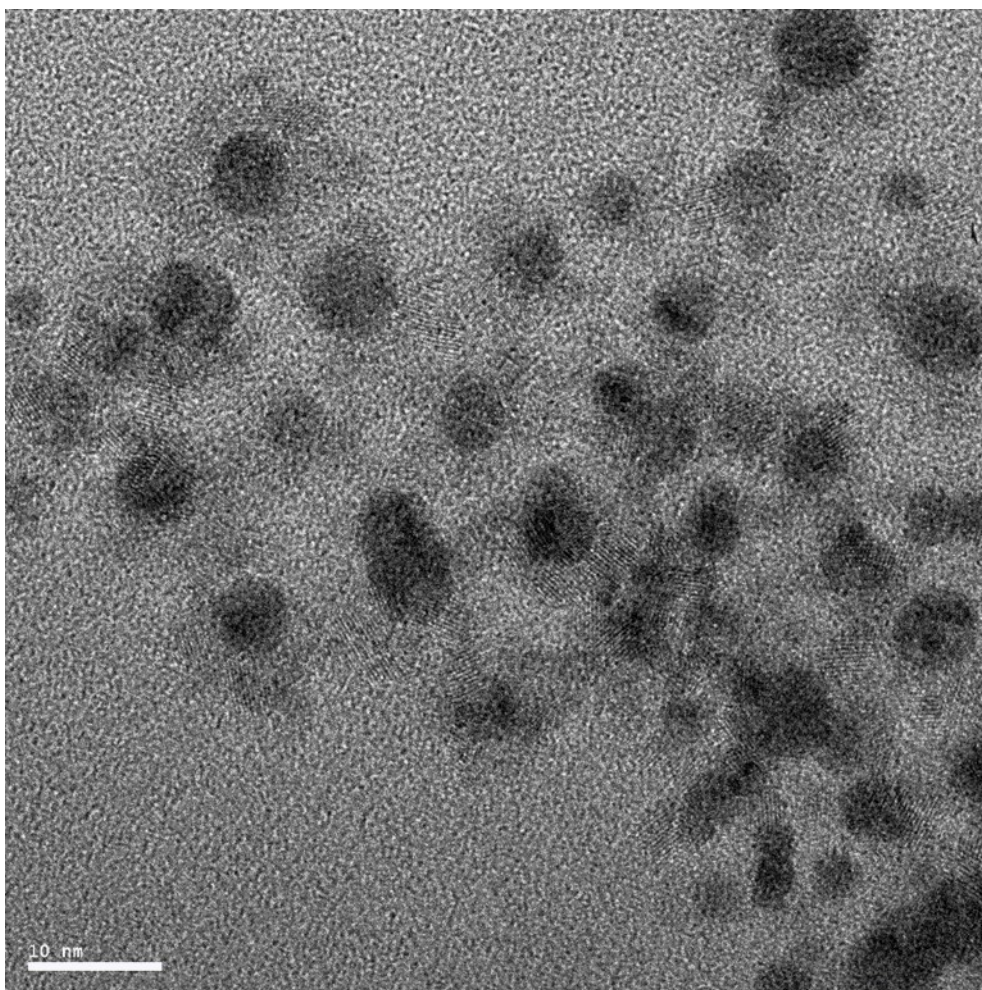

**Figure SI-2:** High-resolution TEM (HRTEM) images revealing the details of the  $\text{CeO}_2$  shell, which is composed of small NPs with sizes around 3-4 nm closely bound to the Au core.

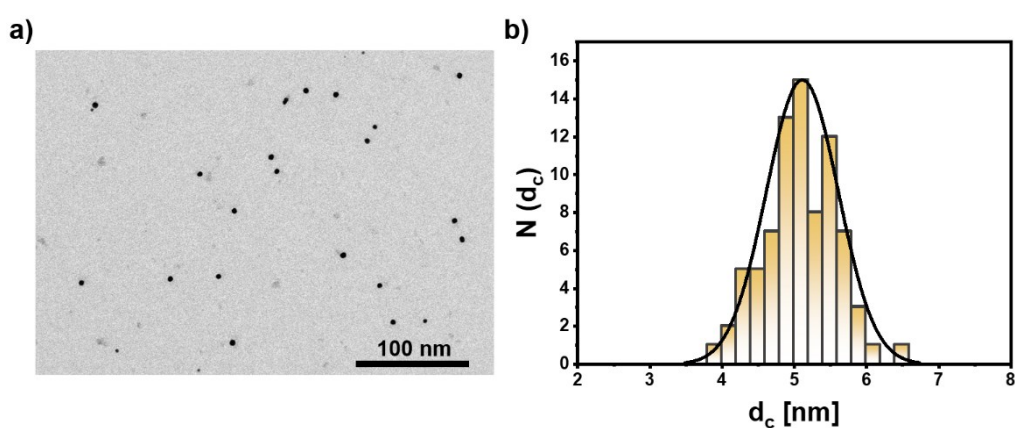

**Figure SI-3:** TEM image of pure Au NPs and (b) the related size distribution  $N(d_c)$  histograms from the core diameter ( $d_c$ ) of the NPs. The mean diameter of the pure Au NPs is  $d_c = 5.1 \pm 0.5$  nm. This corresponds well to the size of the Au part of the  $\text{Au@CeO}_2$  hybrid NPs.

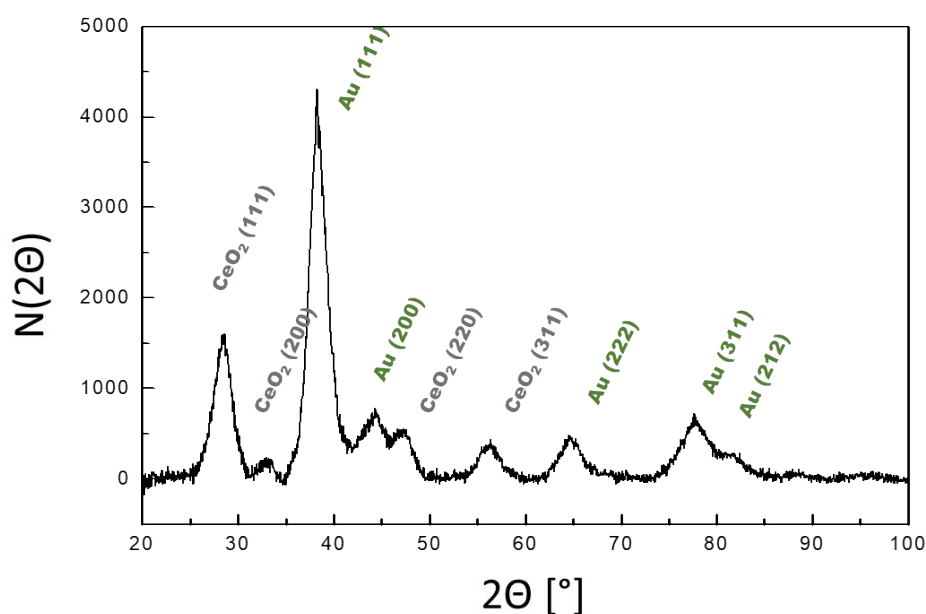

**Figure SI-4:** Number of counts  $N$  of the X-ray diffraction (XRD) in dependence of the angle  $\Theta$  of hybrid Au@CeO<sub>2</sub> NPs. Two series of sets of diffraction peaks are present, which are assigned to the fluorite (cubic) CeO<sub>2</sub> phase (JCPDS No 34-0394) and to the cubic Au phase (JCPDS No 04-0784). The diffraction peaks of the Au core are sharp and intense, while those of CeO<sub>2</sub> are broad and weak, accordingly with the small crystalline size of the CeO<sub>2</sub> nanoparticles composing the shell.

*Optical NP characterization in water:* The NPs were characterized in water by UV/VIS-absorption spectra and fluorescence spectroscopy. Absorption spectra showed a plasmon peak around 540 nm in the hybrid Au/CeO<sub>2</sub> core/shell NPs, in addition to the absorption of the CeO<sub>2</sub> NPs, which originates from the Au cores (Figure SI-5a). The fluorescence of Au/CeO<sub>2</sub> core/shell NPs showed the same peak as the pure CeO<sub>2</sub> NPs, and thus originates from the CeO<sub>2</sub> shell (Figure SI-5b). As control, Au NPs with similar size as the Au cores in the hybrid Au/CeO<sub>2</sub> core/shell NPs were prepared. The Au NPs had an absorption peak similar to the Au cores of the Au/CeO<sub>2</sub> hybrid NPs (Figure SI-5c).

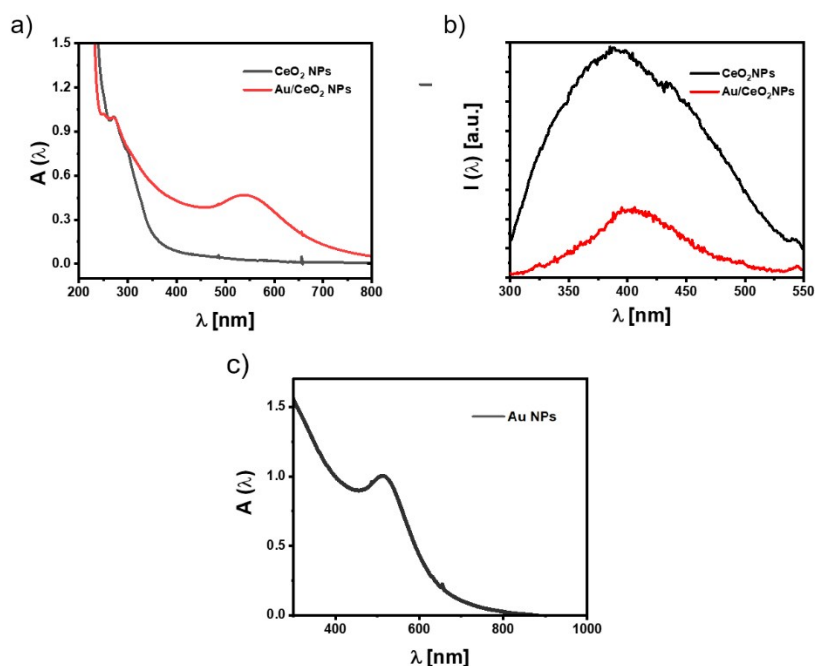

**Figure SI-5:** a) Absorption and b) fluorescence spectra (with excitation at 290 nm) of pure  $\text{CeO}_2$  and hybrid  $\text{Au/CeO}_2$  NPs in water. Spectra were recorded in quartz cuvettes. c) Absorption spectrum of Au NPs in water.

*Colloidal NP characterization in water:* The NPs were characterized in water by a Malvern Zetasizer combining dynamic light scattering (DLS) and Laser Doppler Anemometry (LDA). The hydrodynamic diameters  $d_h$  of the three types of NPs were determined by DLS as 20 nm for the pure  $\text{CeO}_2$  NPs, 15 nm for the  $\text{Au/CeO}_2$  NPs, and 6 nm for the Au NPs. The DLS data are shown in Figure SI-6. The zeta-potentials  $\zeta$  as determined with LDA are shown in Table SI-1.

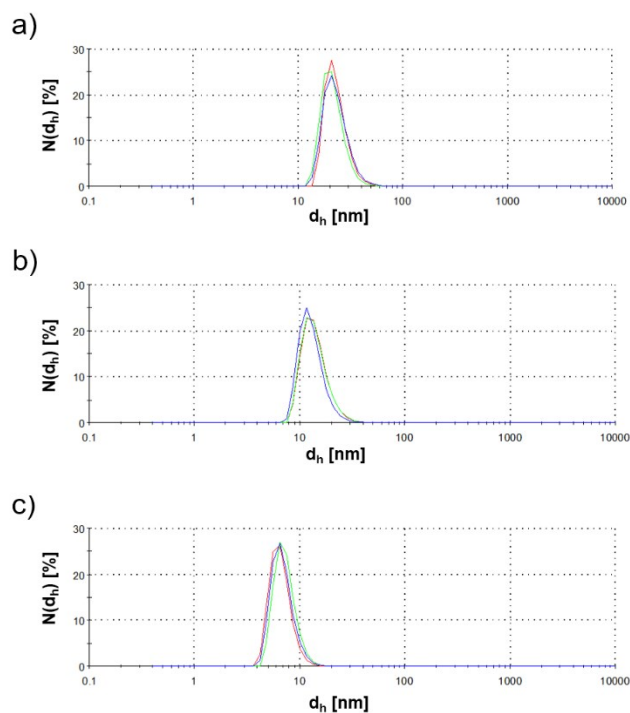

**Figure SI-6:** DLS number distribution  $N(d_h)$  of the hydrodynamic diameters  $d_h$  of a) pure  $\text{CeO}_2$  NPs, b) hybrid  $\text{Au/CeO}_2$  NPs, and c) Au NPs.

| NP type           | $\zeta$ [mV]     |
|-------------------|------------------|
| $\text{CeO}_2$    | $-39.7 \pm 1.67$ |
| $\text{Au/CeO}_2$ | $-42.9 \pm 0.1$  |

**Table SI-1:** Zeta potential  $\zeta$  of pure  $\text{CeO}_2$ , and hybrid  $\text{Au/CeO}_2$  NPs, as recorded in water with LDA.

*Working electrodes:* The working electrodes used in this work were  $1 \text{ cm} \times 1 \text{ cm}$  gold chips. The structure layout was  $500 \text{ }\mu\text{m}$  glass/ $20 \text{ nm}$  Ti/ $200 \text{ nm}$  Au (Suzhou Research Materials Microtech Co. Ltd, China). In the measurements, the Au area exposed to the solution is  $A_{\text{chip}} \approx 0.28 \text{ cm}^2$  based on a circular electrochemical cell with  $0.6 \text{ cm}$  diameter.



## II) Characterization of nanoparticle deposition in a flow system with quartz crystal microbalance measurements

Firstly, the mass of per NP was calculated by using the bulk densities  $\rho_{Au} = 19.32 \text{ g/cm}^3$  and  $\rho_{CeO_2} = 7.22 \text{ g/cm}^3$ , and the core diameter  $d_c$  (*i.e.* the inorganic NP part without the organic surface coating) as determined by transmission electron microscopy (TEM, cf. Figure 1 in the main article. For Au/CeO<sub>2</sub> NPs, when the NPs are assumed as a perfect sphere (cf. Figure SI-7), the volume of one Au core can be calculated as  $V_{Au} = 4/3 \times \pi \times (d_c(Au)/2)^3 = 96.9 \text{ nm}^3$ . Based on this, the volume of the CeO<sub>2</sub> shell can be calculated as  $V_{CeO_2} = 4/3 \times \pi \times ((d_c(Au/CeO_2)/2)^3 - (d_c(Au)/2)^3) = 853.4 \text{ nm}^3$ .<sup>2</sup> Thus, the mass of one Au/CeO<sub>2</sub> NP (excluding the organic surface coating) is estimated to  $m_{Au/CeO_2} = \rho_{Au} \times V_{Au} + \rho_{CeO_2} \times V_{CeO_2} = 8.034 \times 10^{-18} \text{ g}$ . For the CeO<sub>2</sub> NPs, the volume of one CeO<sub>2</sub> core is  $V_{CeO_2} = 4/3 \times \pi \times (d_c(CeO_2)/2)^3 = 1595.4 \text{ nm}^3$ . Thus, the mass of one CeO<sub>2</sub> NP is  $m_{CeO_2} = \rho_{CeO_2} \times V_{CeO_2} = 11.5 \times 10^{-18} \text{ g}$ .

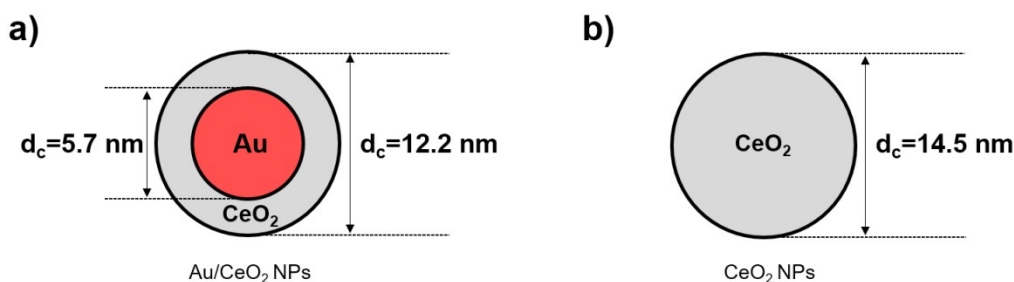

**Figure SI-7:** Sketch, showing the dimensions of the Au/CeO<sub>2</sub> NPs and CeO<sub>2</sub> NPs, as derived with TEM.

The amount of NPs adsorbed to the surfaces (such as the Au electrodes) was determined by quartz crystal microbalance (QCM) measurements. In the case the energy dissipation parameters change ( $\Delta D$ ) is less than  $10^{-6}$  per 5 Hz of frequency change ( $\Delta f$ ), the mass loaded is proportional to the frequency change according to the Sauerbrey relation:  $\Delta m' = -C \cdot \Delta f / n$ , where  $\Delta m'$  is the mass change normalized to the surface area,  $C = 17.7 \text{ ng} \cdot \text{Hz}^{-1} \cdot \text{cm}^{-2}$ , and  $n$  is the overtone number.<sup>3</sup> The Sauerbrey relation was used in this way for the calculation of the mass change  $\Delta m'$  on a gold surface due to the adsorption of NPs. The experimentally determined frequency changes as shown in Figure SI-8 are  $\Delta f_{CeO_2} = -(14.343 \pm 0.096) \text{ Hz}$  ( $\Delta D = 0.9 \times 10^{-6}$ ,  $\Delta D / \Delta f < 0.5 \times 10^{-6} \text{ Hz}$ ), and  $\Delta f_{Au/CeO_2} = -(7.96 \pm 0.18) \text{ Hz}$  ( $\Delta D = 0.92 \times 10^{-6}$ ,  $\Delta D / \Delta f < 0.5 \times 10^{-6} \text{ Hz}$ ). Thus, based on the Sauerbrey relation NP immobilization on the gold-quartz electrodes resulted in following mass changes:  $\Delta m'_{CeO_2} = (84.6237 \pm 0.5664) \text{ ng cm}^{-2}$ ,  $\Delta m'_{Au/CeO_2} = (46.964 \pm 1.062) \text{ ng cm}^{-2}$ . Using the mass of one NP and the mass changes per area, the number of NPs per cm<sup>2</sup> is  $n_{CeO_2} = \Delta m'_{CeO_2} / m_{CeO_2} = (7.3 \pm 0.1) \times 10^9 \text{ cm}^{-2}$  and  $n_{Au/CeO_2} = (5.9 \pm 0.1) \times 10^9 \text{ cm}^{-2}$ . This suggests a comparable NP surface loading for both types of NPs. In case of the CeO<sub>2</sub> NPs the percentage of electrode surface coated by NPs can be calculates as the number of NPs per surface area times the cross-section area of one NP (with  $d_c$  as derived from Figure 1):  $n_{CeO_2} \cdot \pi \cdot (d_c(CeO_2)/2)^2 \approx 1.2\%$  (note that here the spherical geometry of the

NPs is neglected and thus a full coverage of 100% would not be possible) For the Au/CeO<sub>2</sub> NPs the surface coverage is  $n_{Au/CeO_2} \cdot \pi \cdot (d_c(Au/CeO_2)/2)^2 \approx 0.69\%$ . This means, that the NP covering density of the Au electrodes is very low. Measurements with the QCM however were recorded under flow conditions within a short time span, in contrast to the electrode preparations for PEC measurements. Furthermore, the Au substrates were not identical for both cases. Thus, for the case of the Au electrodes used for PEC measurements higher coverage with NPs is expected. This was also checked by atomic force microscopy (AFM), in which a significant part of the electrode surface was found to be covered with NPs. A more detailed picture on the NP deposition on the gold electrodes has been obtained by UV/VIS absorption measurements as shown in § IV. All methods however, demonstrate that there is a higher coverage of the electrode with CeO<sub>2</sub> than with Au/ CeO<sub>2</sub> NPs.

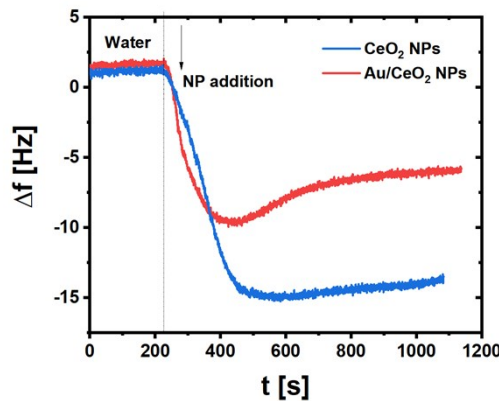

**Figure SI-8:** QCM analysis of the adsorption of CeO<sub>2</sub> and Au/CeO<sub>2</sub> NPs on the surface of Au electrodes, forming a single layer structure (Au/cysteamine/NPs). The measurements were carried out at 24 °C using Q-sense to monitor the changes in the resonances frequencies ( $\Delta f$ ) and energy dissipation parameters ( $\Delta D$ ), with  $f = 5$  MHz fundamental resonance quartz crystal frequency.

### III) Characterization of nanoparticle deposition in a batch mode with UV/VIS absorption spectroscopy

Adsorption of NPs to the Au electrodes was further characterized by UV/VIS absorption spectroscopy in the air. The absorptions spectrum of Au electrodes modified with cysteamine only were used as reference blank, see Figure SI-9. Changes in absorption after addition of the NPs verified successful deposition of the NPs to the Au electrode. Comparing to the Au electrodes used in the PEC measurements, the Au electrodes used here do not contain a Ti intermediate layer between the glass substrate and the Au film, in order to improve light transmittance. The gold electrodes used here to measure the absorption spectra in air are 500  $\mu\text{m}$  glass/200 nm Au electrodes (Suzhou Research Materials Microtech Co. Ltd, China).

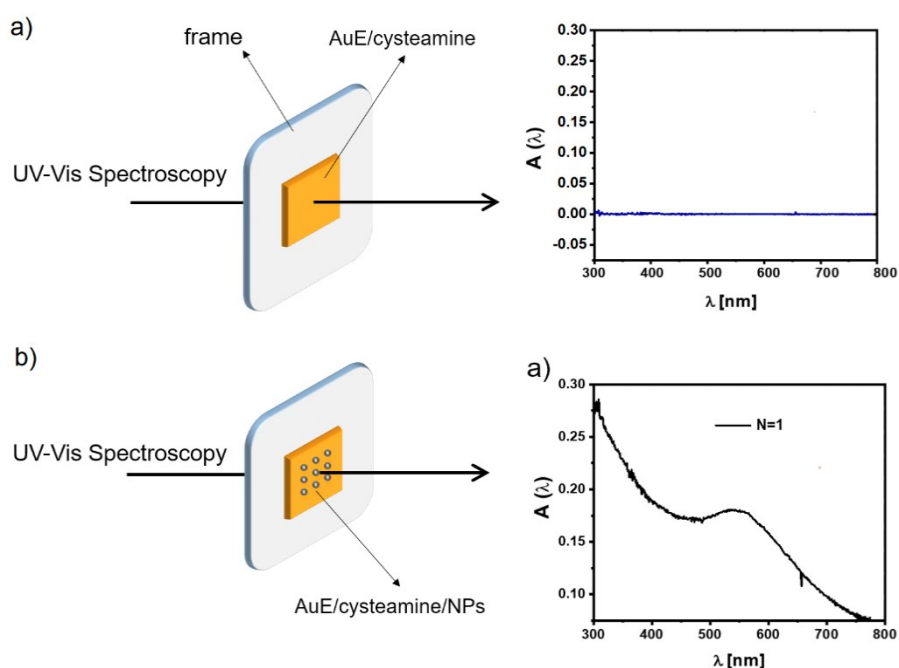

**Figure SI-9:** Sketch of the experimental set-up. a) First, a cysteamine modified gold electrode (Au/cysteamine) was fixed on an acrylic frame for obtaining a stable reference spectrum  $A(\lambda)$ . b) Afterwards, a single layer of NPs was immobilized on the Au/cysteamine electrode and the absorption spectrum was again recorded, whereby the reference spectrum was used as blank, i.e. was subtracted. The here plotted absorption spectrum  $A(\lambda)$  corresponds to a single layer of Au/CeO<sub>2</sub> NPs.

#### **IV) Characterization of nanoparticle deposition in multiple layers with UV/VIS absorption spectroscopy**

In Figure SI-10 and Figure SI-11 the consecutive absorption spectra as recorded in air upon the subsequent assembly of NP layers are shown. The set-up is the same as shown in Figure SI-9. The absorption at 350 nm *versus* the layer number is shown in Figure 3b of the main manuscript. For the measurements of the absorption spectrum of an electrode with N layers of NPs, the absorption spectrum of the same electrode with N-1 layers of NPs was used as blank. For electrodes with just N = 1 layer of NPs (cf. Figure SI-9), the same electrode without NP layer was used as blank. Due to absorption of the glass substrate of the glass/Au electrode chips, only wavelengths  $\lambda > 300$  nm were measured.

Figure SI-10, which has been recorded with CeO<sub>2</sub> NPs, shows no peak in the visible range. Increase of absorption with rising number of layers N demonstrates immobilization of the NPs. In contrast, in Figure SI-11, which has been recorded with Au/CeO<sub>2</sub> NPs, a clear peak can be found around 540 nm, which is due to absorption of the Au cores.



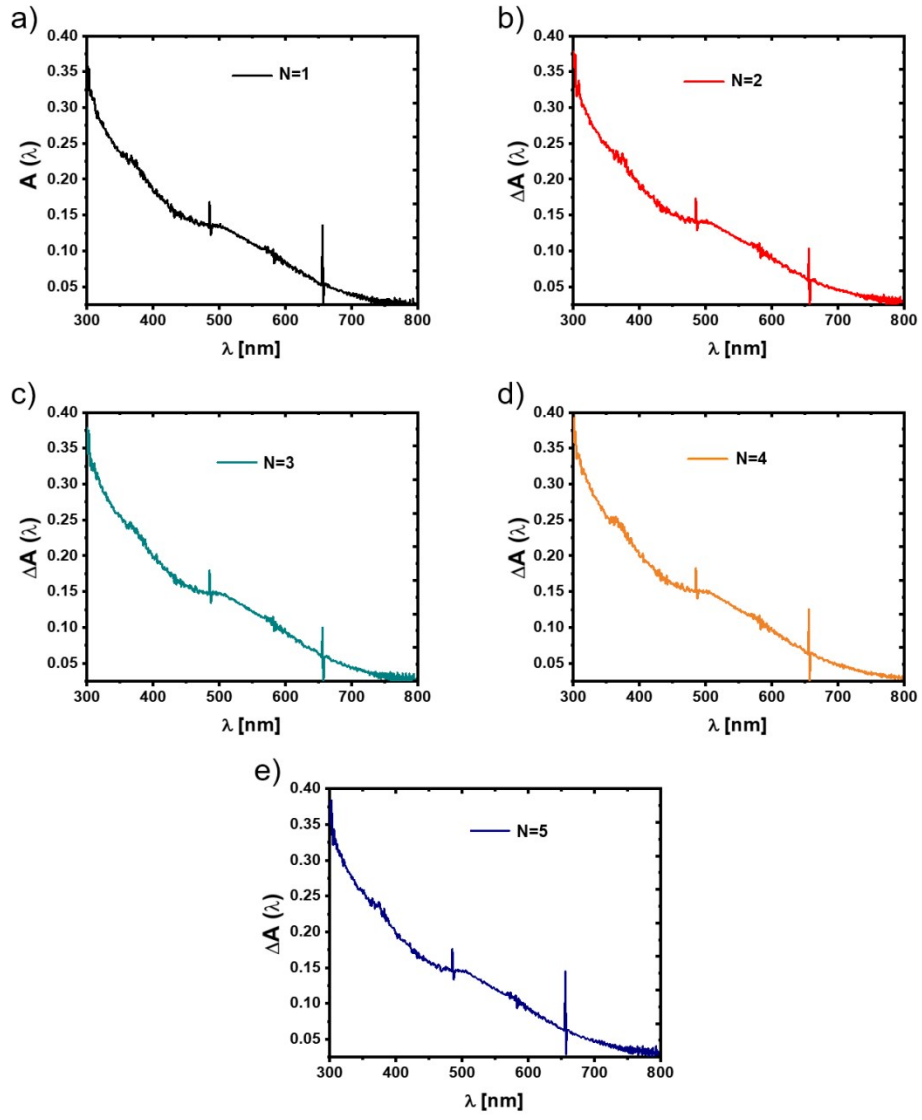

**Figure SI-10:** Differential absorption spectrum  $\Delta A(\lambda)$  of gold electrodes with  $N$  layers of immobilized  $\text{CeO}_2$  NPs. The spikes in the spectra are experimental artefacts.

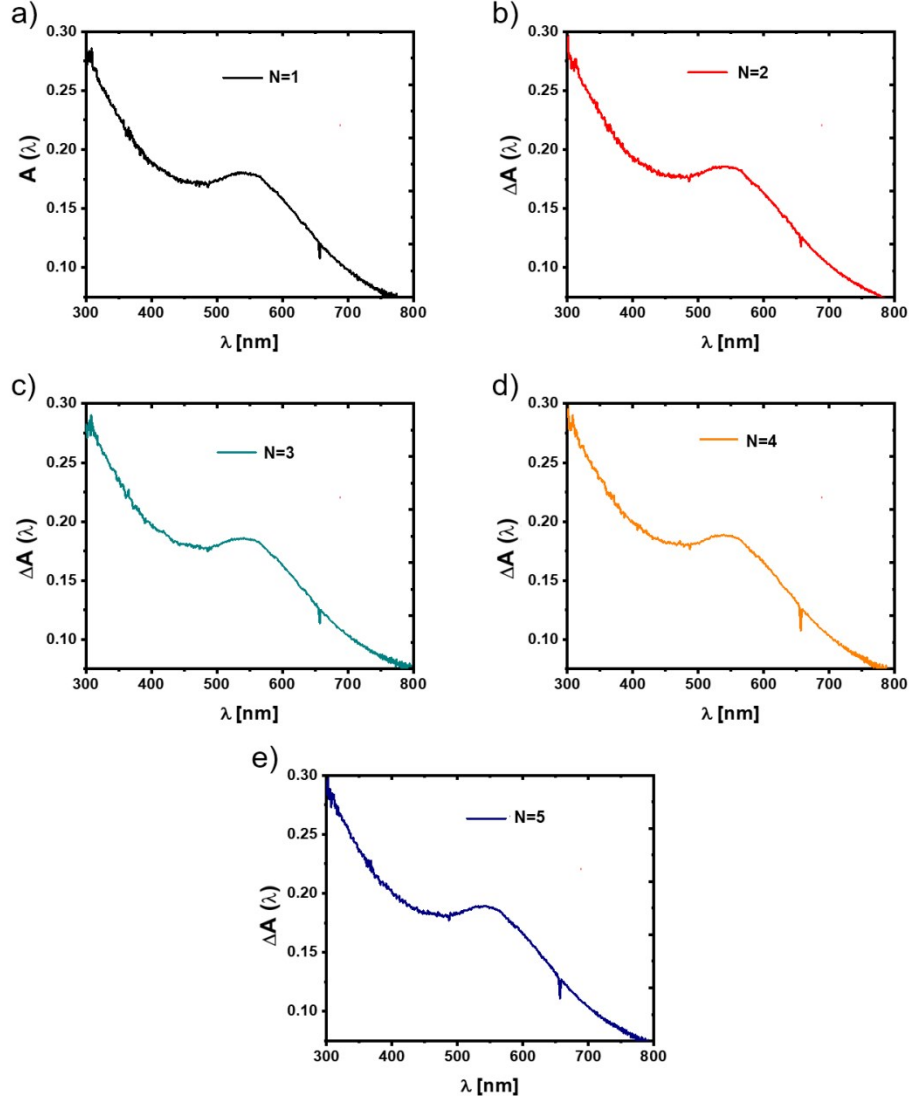

**Figure SI-11:** Differential absorption spectrum  $\Delta A(\lambda)$  of gold electrodes with  $N$  layers of immobilized  $\text{Au/CeO}_2$  NPs. The spikes in the spectra are experimental artefacts.

From the differential absorption spectra of the characterized multilayer structures (Figure 3b, Figure SI-10 and Figure SI-11), the number of NPs of each layer per  $\text{cm}^2$  ( $n$ ) was calculated. The extinction coefficient  $\varepsilon(\lambda)$  [ $\text{mL}\cdot\text{ng}^{-1}/\text{cm}$ ] could be calculated from solution spectra  $A(\lambda)$ , as recorded in a cuvette with pathlength  $l_{\text{solution}}$  and a volume  $V_{\text{solution}}$ , in which  $N_{\text{Au/CeO}_2}$   $\text{Au/CeO}_2$  NPs are dissolved. Each  $\text{Au/CeO}_2$  NP has a mass  $m_{\text{Au/CeO}_2}$  (cf. §II), and thus the total mass of NPs in solution is  $N_{\text{Au/CeO}_2} \cdot m_{\text{Au/CeO}_2}$ .

$$A(\lambda) = \varepsilon(\lambda) \cdot c_{\text{Au/CeO}_2} \cdot l_{\text{solution}}$$

$$c_{\text{Au/CeO}_2} = N_{\text{Au/CeO}_2} \cdot m_{\text{Au/CeO}_2} / V_{\text{solution}}$$

$$\Rightarrow A(\lambda) = \varepsilon(\lambda) \cdot N_{\text{Au/CeO}_2} \cdot m_{\text{Au/CeO}_2} \cdot l_{\text{solution}} / V_{\text{solution}}$$

$$\Rightarrow \varepsilon(\lambda) = A(\lambda) \cdot V_{\text{solution}} / (N_{\text{Au/CeO}_2} \cdot m_{\text{Au/CeO}_2} \cdot l_{\text{solution}}) = A(\lambda) / (c_{\text{Au/CeO}_2} \cdot l_{\text{solution}})$$

Knowing  $\varepsilon(\lambda)$  also allows for determining the number of Au/CeO<sub>2</sub> NPs per area  $n_{Au/CeO_2}$ . For a dried film with thickness  $l_{film}$  and volume  $V_{film}$ , which comprises  $N_{Au/CeO_2}$  NPs the absorption is

$$A(\lambda) = \varepsilon(\lambda) \cdot N_{Au/CeO_2} \cdot m_{Au/CeO_2} \cdot l_{film} / V_{film}$$

$V_{film}/l_{film}$  is the area  $A_{cross}$ , on which  $N_{Au/CeO_2}$  Au/CeO<sub>2</sub> NPs are immobilized, which corresponds to the size of the electrode. The NP density *per* surface area is  $n_{Au/CeO_2} = N_{Au/CeO_2}/A_{cross} = N_{Au/CeO_2} \cdot l_{film} / V_{film}$ .

$$\Rightarrow A(\lambda) = \varepsilon(\lambda) \cdot m_{Au/CeO_2} \cdot n_{Au/CeO_2}$$

$$\Rightarrow n_{Au/CeO_2} = A(\lambda) / (\varepsilon(\lambda) \cdot m_{Au/CeO_2})$$

Instead of deriving  $\varepsilon(\lambda)$  from solution spectra it was done here by casting  $N$  drops of NP solution (total volume  $V_{drops}$ ) with concentration  $c_{Au/CeO_2}$  ( $\Rightarrow N_{Au/CeO_2} = c_{Au/CeO_2} \cdot V_{drops} / m_{Au/CeO_2}$ ) with  $N_{Au/CeO_2}$  Au/CeO<sub>2</sub> NPs on the electrode and drying them to a film with thickness  $l_{film}$  and volume  $V_{film}$ . Upon evaporation the number of NPs remains constant, as does the absorption  $A(\lambda)$ , but the volume is reduced from  $V_{drop}$  to  $V_{film}$ .

$$\begin{aligned} A(\lambda) &= \varepsilon(\lambda) \cdot N_{Au/CeO_2} \cdot m_{Au/CeO_2} \cdot l_{film} / V_{film} = \varepsilon(\lambda) \cdot (c_{Au/CeO_2} \cdot V_{drops} / m_{Au/CeO_2}) \cdot m_{Au/CeO_2} \cdot l_{film} / V_{film} \\ &= \varepsilon(\lambda) \cdot c_{Au/CeO_2} \cdot V_{drops} \cdot l_{film} / V_{film} = \varepsilon(\lambda) \cdot c_{Au/CeO_2} \cdot V_{drops} / A_{chip} \end{aligned}$$

$V_{film}/l_{film} = A_{chip}$  is the area of the electrode covered with the NP film, which is constant for all measurements. The active area of the electrode is a circle with diameter 0.6 cm, *i.e.*  $A_{chip} = 0.28 \text{ cm}^2$ .

$$\Rightarrow \varepsilon(\lambda) = A(\lambda) \cdot A_{chip} / (c_{Au/CeO_2} \cdot V_{drops})$$

Again, the surface coverage of such a film is

$$n_{Au/CeO_2} = A(\lambda) / (\varepsilon(\lambda) \cdot m_{Au/CeO_2})$$

Thus, by measuring the absorption spectrum the surface coverage  $n_{Au/CeO_2}$  of the NPs can be calculated. This is shown for the Au/CeO<sub>2</sub> NP and the CeO<sub>2</sub> NP films in Table SI-2 and Table SI-3.

Hybrid Au/CeO<sub>2</sub> NPs on the Au electrode ( $m_{Au/CeO_2} = 8.034 \times 10^{-18}$  g,  $A_{chip} = 0.28$  cm<sup>2</sup>)

| Method                                                                                                          | N | $V_{drops}$<br>[uL] | $c_{Au/CeO_2}$<br>[ng·mL <sup>-1</sup> ] | $A(\lambda)$<br>( $\lambda = 300$<br>nm) | $\varepsilon(\lambda)$<br>[cm <sup>2</sup> ·ng <sup>-1</sup> ] | $n_{Au/CeO_2}$<br>[cm <sup>-2</sup> ] |
|-----------------------------------------------------------------------------------------------------------------|---|---------------------|------------------------------------------|------------------------------------------|----------------------------------------------------------------|---------------------------------------|
| casting N<br>drops of NP<br>solution<br>followed by<br>drying                                                   | 1 | 30                  | 10740                                    | 0.36                                     | $3.13 \times 10^{-4}$                                          | $1.43 \times 10^{11}$                 |
|                                                                                                                 | 2 | 60                  | 10740                                    | 0.54                                     | $2.34 \times 10^{-4}$                                          | $2.88 \times 10^{11}$                 |
|                                                                                                                 | 3 | 90                  | 10740                                    | 0.77                                     | $2.23 \times 10^{-4}$                                          | $4.32 \times 10^{11}$                 |
|                                                                                                                 |   |                     |                                          |                                          | $2.57 \times 10^{-4}$ (mean)                                   |                                       |
| Method                                                                                                          | N | -                   | -                                        | $A(\lambda)$<br>( $\lambda = 300$<br>nm) | $\varepsilon(\lambda)$<br>[cm <sup>2</sup> ·ng <sup>-1</sup> ] | $n_{Au/CeO_2}$<br>[cm <sup>-2</sup> ] |
| Differential<br>absorption<br>from<br>multilayer<br>structure<br>with N<br>layers as<br>used in<br>Figure SI-11 | 1 | -                   | -                                        | 0.28                                     | $2.57 \times 10^{-4}$                                          | $1.36 \times 10^{11}$                 |
|                                                                                                                 | 2 | -                   | -                                        | 0.3                                      |                                                                | $1.46 \times 10^{11}$                 |
|                                                                                                                 | 3 | -                   | -                                        | 0.28                                     |                                                                | $1.36 \times 10^{11}$                 |
|                                                                                                                 | 4 | -                   | -                                        | 0.3                                      |                                                                | $1.46 \times 10^{11}$                 |
|                                                                                                                 | 5 | -                   | -                                        | 0.29                                     |                                                                | $1.41 \times 10^{11}$                 |
|                                                                                                                 |   |                     |                                          |                                          |                                                                | $1.41 \times 10^{11}$ (mean)          |

**Table SI-2:** The calculations of the extinction coefficient  $\varepsilon(\lambda=300$  nm) and the number of Au/CeO<sub>2</sub> NPs per cm<sup>2</sup> ( $n_{Au/CeO_2}$ ) on the Au electrode.



CeO<sub>2</sub> NPs on the Au electrode ( $m_{CeO_2} = 11.5 \times 10^{-18}$  g,  $A_{chip} = 0.28$  cm<sup>2</sup>)

| Method                                                                                                          | N | $V_{drops}$<br>[uL] | $c_{CeO_2}$<br>[ng·mL <sup>-1</sup> ] | $A(\lambda)$<br>( $\lambda = 300$ nm) | $\varepsilon(\lambda)$<br>[cm <sup>2</sup> ·ng <sup>-1</sup> ] | $n_{CeO_2}$<br>[cm <sup>-2</sup> ] |
|-----------------------------------------------------------------------------------------------------------------|---|---------------------|---------------------------------------|---------------------------------------|----------------------------------------------------------------|------------------------------------|
| casting N<br>drops of NP<br>solution<br>followed by<br>drying                                                   | 1 | 30                  | 18627                                 | 0.18                                  | $0.902 \times 10^{-4}$                                         | $1.74 \times 10^{11}$              |
|                                                                                                                 | 2 | 60                  | 18627                                 | 0.31                                  | $0.777 \times 10^{-4}$                                         | $3.47 \times 10^{11}$              |
|                                                                                                                 | 3 | 90                  | 18627                                 | 0.47                                  | $0.785 \times 10^{-4}$                                         | $5.21 \times 10^{11}$              |
|                                                                                                                 |   |                     |                                       |                                       | $0.821 \times 10^{-4}$<br>(mean)                               |                                    |
| Method                                                                                                          | N | -                   | -                                     | $A(\lambda)$<br>( $\lambda = 300$ nm) | $\varepsilon(\lambda)$<br>[cm <sup>2</sup> ·ng <sup>-1</sup> ] | $n_{CeO_2}$<br>[cm <sup>-2</sup> ] |
| Differential<br>absorption<br>from<br>multilayer<br>structure<br>with N<br>layers as<br>used in<br>Figure SI-10 | 1 | -                   | -                                     | 0.36                                  | $0.821 \times 10^{-4}$                                         | $3.81 \times 10^{11}$              |
|                                                                                                                 | 2 | -                   | -                                     | 0.38                                  |                                                                | $4.02 \times 10^{11}$              |
|                                                                                                                 | 3 | -                   | -                                     | 0.38                                  |                                                                | $4.02 \times 10^{11}$              |
|                                                                                                                 | 4 | -                   | -                                     | 0.4                                   |                                                                | $4.24 \times 10^{11}$              |
|                                                                                                                 | 5 | -                   | -                                     | 0.38                                  |                                                                | $4.02 \times 10^{11}$              |
|                                                                                                                 |   |                     |                                       |                                       |                                                                | $4.02 \times 10^{11}$ (mean)       |

**Table SI-3:** The calculations of the extinction coefficient  $\varepsilon(\lambda=300$  nm) and the number of CeO<sub>2</sub> NPs per cm<sup>2</sup> ( $n_{Au/CeO_2}$ ) on the Au electrode.

From the NP surface densities  $n_{CeO_2} = 4.02 \times 10^{11}$  cm<sup>-2</sup> and  $n_{Au/CeO_2} = 1.41 \times 10^{11}$  cm<sup>-2</sup> the surface coverages  $n_{CeO_2} \cdot \pi \cdot (d_c(CeO_2)/2)^2 \approx 66\%$  and  $n_{Au/CeO_2} \cdot \pi \cdot (d_c(Au/CeO_2)/2)^2 \approx 16\%$  could be calculated analogous to §II. In agreement with the QCM measurements from §II these data show higher coverage of the electrode with CeO<sub>2</sub> than with Au/CeO<sub>2</sub> NPs. However, the absorption spectrum data (which were recorded without flow) show much higher surface coverage than the QCM data (which were recorded with flow), and these numbers correspond better to the qualitative AFM data.

## V) Description of the used experimental set-up for measuring photocurrents

Photocurrents were measured by a homebuilt photoelectrochemical system, whose photograph is shown in Figure SI-12. A detailed scheme of the set-up is shown in Figure SI-13. This system is based on previous set-ups<sup>4-7</sup>. A Faraday cage was used for eliminating electromagnetic interference.

A potentiostat from CH Instruments was used to apply a constant bias voltage  $U$  with a three-electrode system, including the working electrode (WE) of gold covered with the NPs, a counter electrode (CE) of Pt, and a reference electrode (RE) of Ag/AgCl 3 M NaCl. Photocurrents were amplified and rectified with a lock-in amplifier (EG&G Model # 5210). After that, the photocurrent was read in by a computer using LabVIEW software.

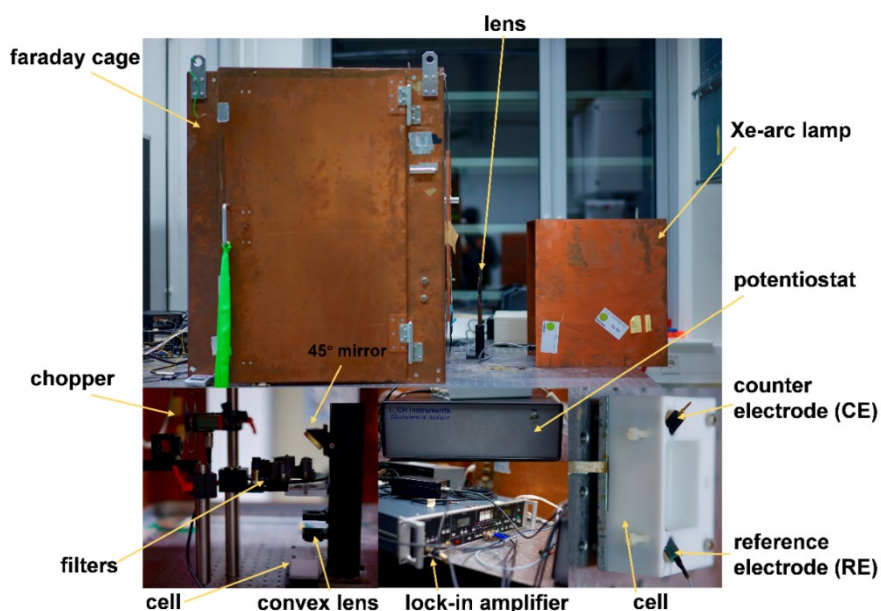

**Figure SI-12:** Photograph of the homebuilt PEC system.

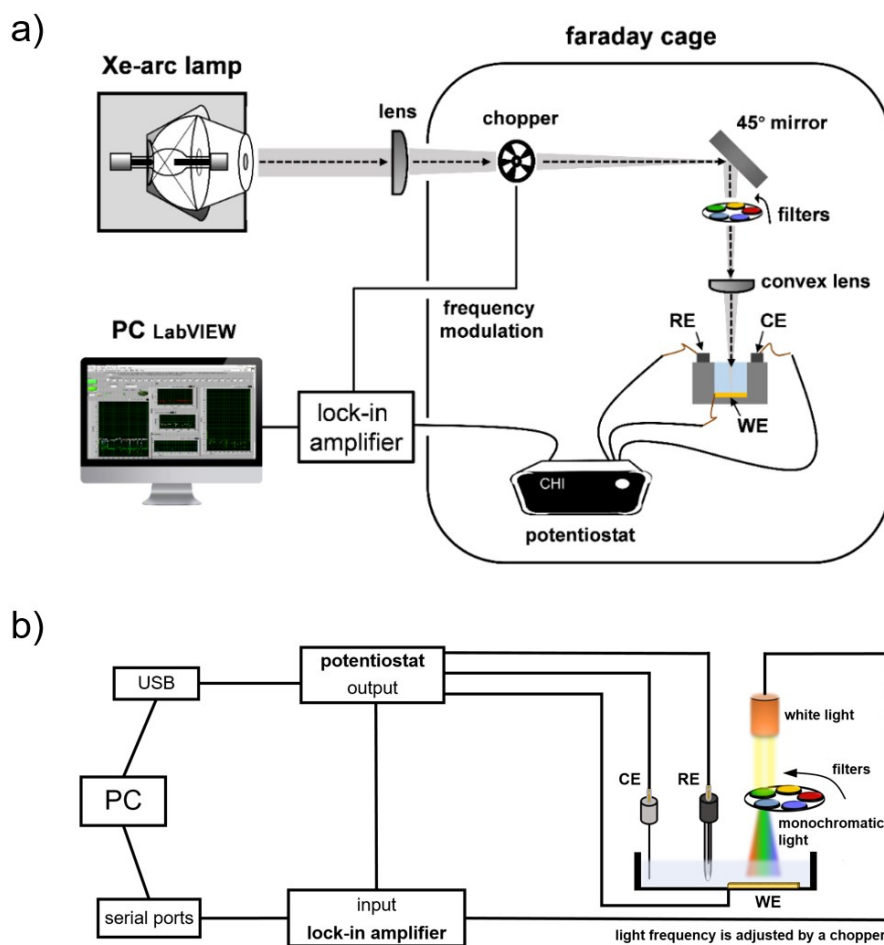

**Figure SI-13:** a) Scheme of the photoelectrochemical system. b) The diagram of the photoelectrochemical measurement system. The working electrode (WE) was a gold electrode modified with  $\text{CeO}_2$  or  $\text{Au/CeO}_2$  core/shell hybrid NPs. A Pt wire and an  $\text{Ag/AgCl}$  (3 M NaCl) electrode were used as counter electrode (CE) and reference electrode (RE), respectively.

A detailed description of the teflon cell is shown in Figure SI-14a. The WE was fixed and well-sealed by an o ring between a teflon and aluminum sheet with the help of four screws. Conductive tapes were used electrically connect the WE for recording of the generated photocurrents. The hole size of the teflon cell was 6 mm, which determined the size of the illuminated spot of the WE ( $A_{\text{chip}} \approx 0.28 \text{ cm}^2$ ).

A Xe-arc lamp (Ushio, Inc., Japan) was applied as white light source from 250 nm to 1100 nm. Focused by several lenses and modulated by a chopper, the light beam with 6 mm diameter spot size was finally illuminating the working electrode surface in a teflon cell. The modulation frequency was chosen as 71 Hz, which also was used as reference frequency of the lock-in amplifier. Different optical filters were used to obtain different colors from the white light. The filters were  $340 \pm 26 \text{ nm}$  (BrightLine),  $405 \pm 10 \text{ nm}$  (BrightLine),  $470 \pm 40 \text{ nm}$  (CHROMA),  $540 \pm 25 \text{ nm}$  (CHROMA),  $620 \pm 20$

nm (CHROMA),  $725 \pm 50$  nm (CarlZeiss), and  $870 \pm 50$  nm (CHROMA). These band-pass filters allowed for transmission of ca. 80%-90% of the light intensity at the respective wavelengths. We did not measure the specific power hitting the electrode surface. The white light spectral distribution of the Xe-arc lamp is shown in Figure SI-14b.

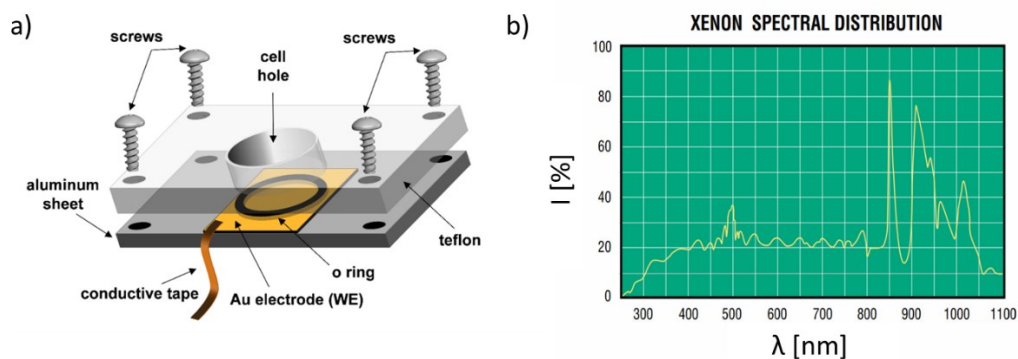

**Figure SI-14:** a) *Sketch of the electrochemical cell used in this work.* b) *Spectral distribution of the used Xe-arc lamp given as wavelength-dependent relative intensity  $I(\lambda)$ . This image has been taken from the webpage of the manufacturer (<https://www.ushio.com/product/uxl-xenon-short-arc/>).*



## VI) Photocurrent measurements

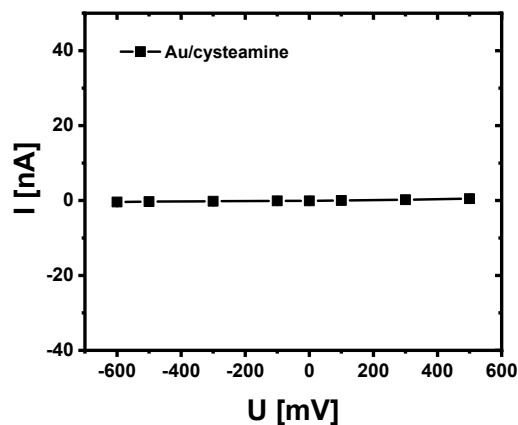

**Figure SI-15:** Photocurrent at different bias potentials  $U$  recorded in 0.01 M PBS under white light illumination with Au/cysteamine electrodes without immobilized NPs.

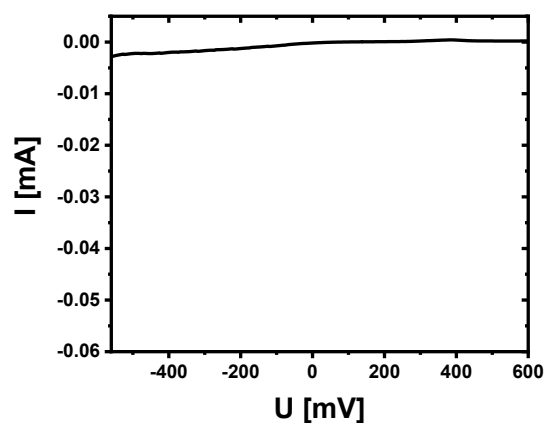

**Figure SI-16:** Chopped light voltammetry of gold electrodes modified with 5 layers of Au NPs in PBS with 5 mM  $H_2O_2$ .

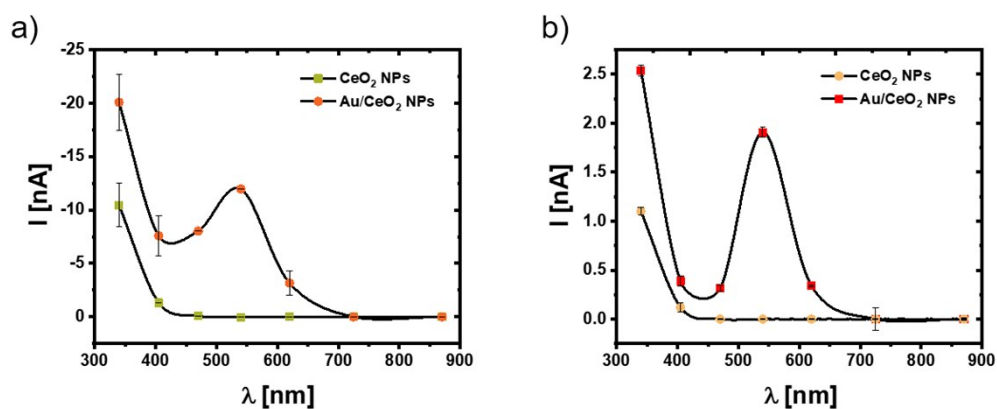

**Figure SI-17:** Wavelength dependence of the photocurrent  $I(\lambda)$  recorded on Au electrodes modified with  $N = 5$  layers CeO<sub>2</sub> NPs or 5 layers Au/CeO<sub>2</sub> NPs at a)  $U = -$

300 and b)  $U = 300 \text{ mV}$  vs. Ag/AgCl in 0.01 M PBS under illumination with light of different wavelengths  $\lambda$ .

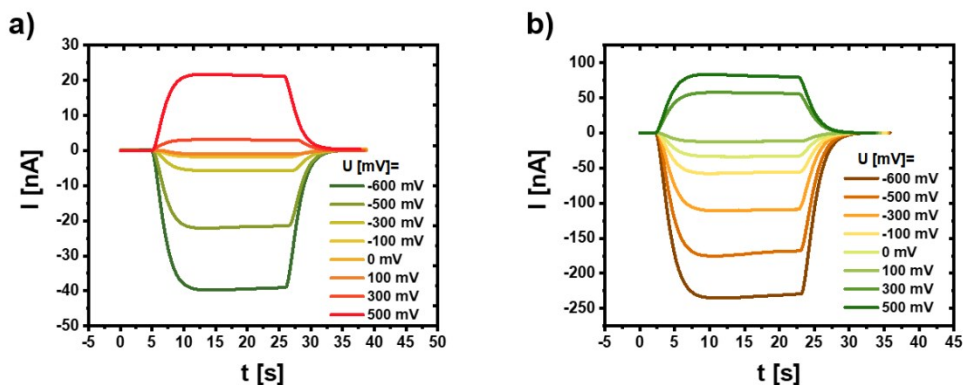

**Figure SI-18:** Transient photocurrents  $I(t)$  at different bias potential  $U$  vs. Ag/AgCl from a)  $N = 5$  layers  $\text{CeO}_2$  NPs and b)  $N = 5$  layers Au/ $\text{CeO}_2$  NPs in 0.01 M PBS under illumination of white light.

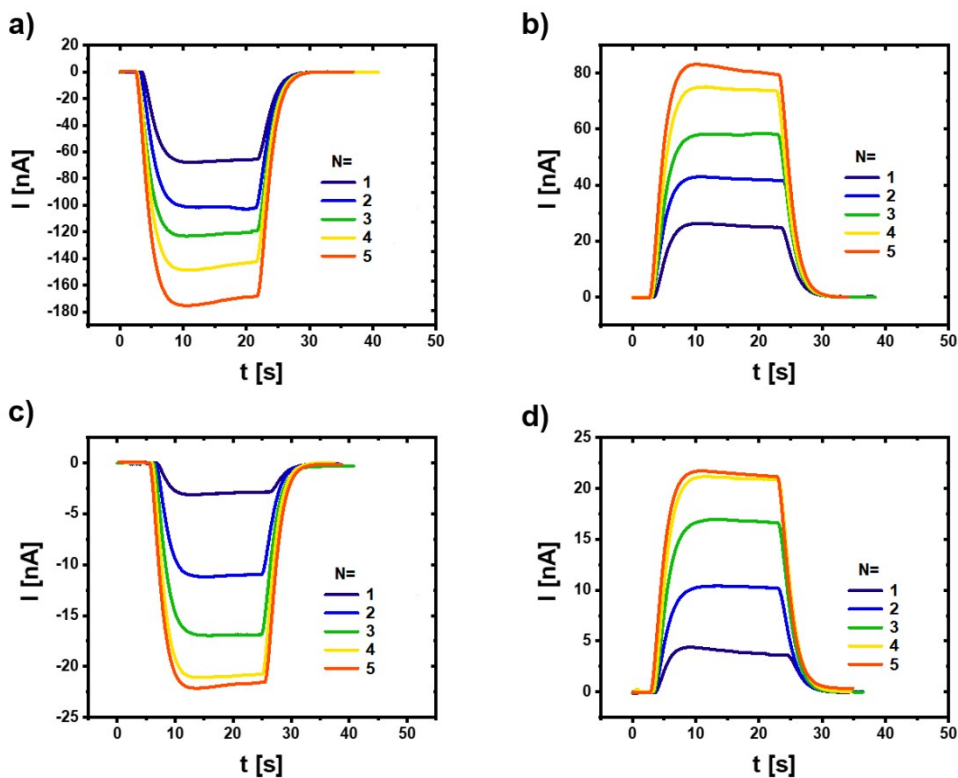

**Figure SI-19:** Transient photocurrents  $I(t)$  as recorded on Au electrodes with different numbers  $N$  of NP layers and different bias potential  $U$  under white light illumination in 0.01 PBS. a) Au/ $\text{CeO}_2$  NPs at  $U = -500 \text{ mV}$ . b) Au/ $\text{CeO}_2$  NPs at  $U = 500 \text{ mV}$ , c)  $\text{CeO}_2$  NPs at  $U = -500 \text{ mV}$ . d)  $\text{CeO}_2$  NPs at  $U = 500 \text{ mV}$  vs. Ag/AgCl.

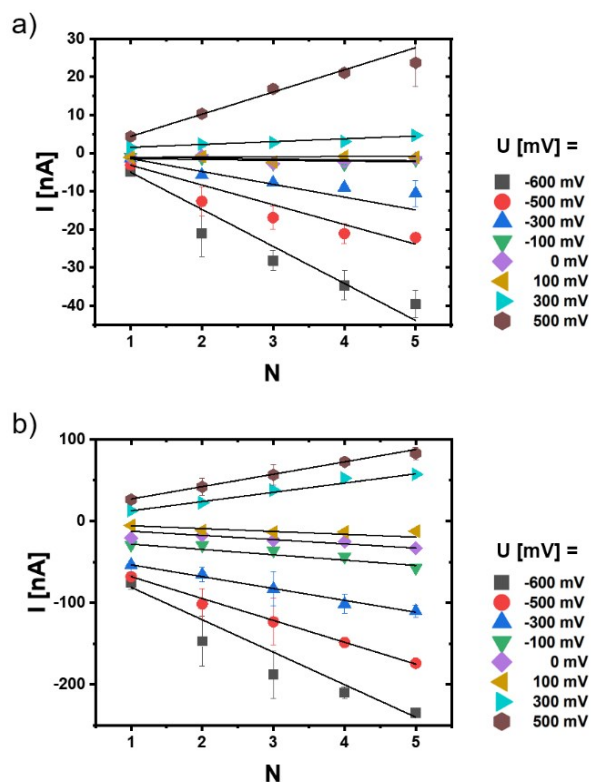

**Figure SI-20:** Photocurrents  $I$  as recorded under white light in 0.01 M PBS pH=7.4 of Au electrodes modified with  $N$  layers of a)  $\text{CeO}_2$  NPs and b)  $\text{Au/CeO}_2$  NPs at different potentials  $U$ .

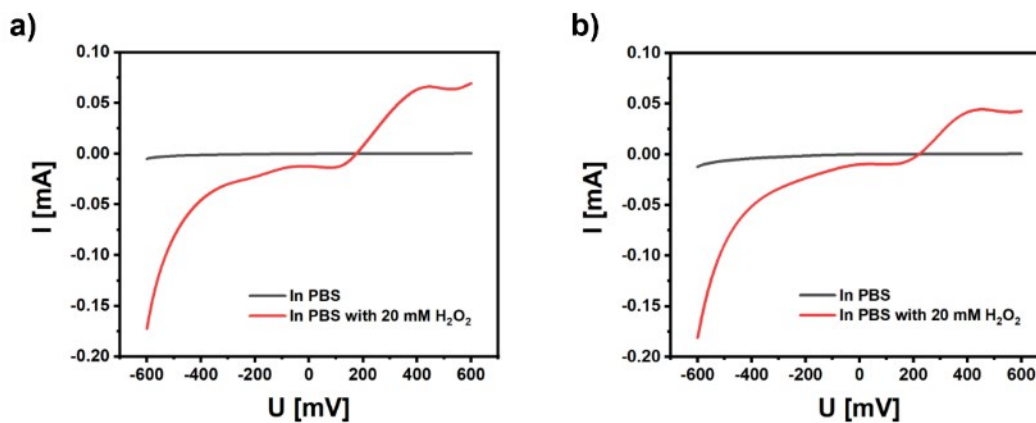

**Figure SI-21:** Cyclic voltammetric measurements without light of (a) 5 layers  $\text{CeO}_2$  NPs and (b) 5 layers  $\text{Au/CeO}_2$  NPs immobilised on gold electrodes in 100 mM PBS buffer pH = 7.4 and in buffer with 20 mM  $\text{H}_2\text{O}_2$  using potential scanning from -600 mV to 600 mV vs Ag/AgCl. The scan rate was 5 mV/s.

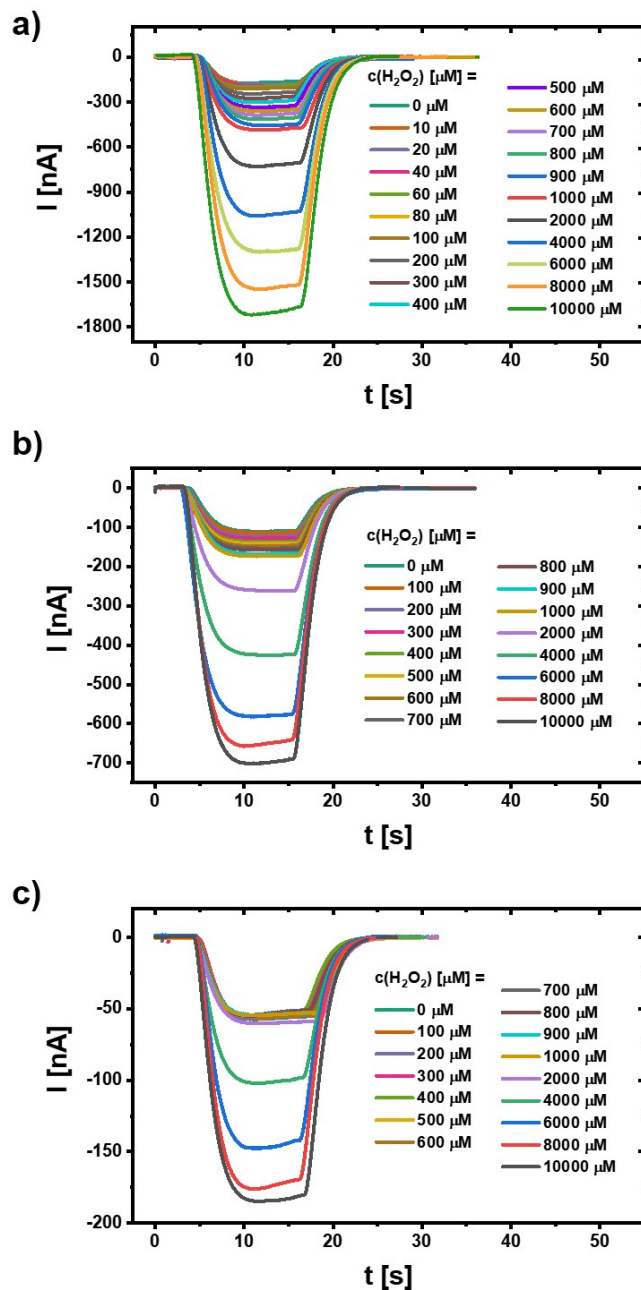

**Figure SI-22:** Transient photocurrents  $I(t)$  recorded under white light illumination at different  $H_2O_2$  concentrations  $c(H_2O_2)$  recorded on Au electrodes with  $N = 5$  layers of  $Au/CeO_2$  NPs. The bias potentials  $U$  vs.  $Ag/AgCl$  with 3 M  $NaCl$  were a) -500 mV, b) -300 mV, and c) -100 mV.



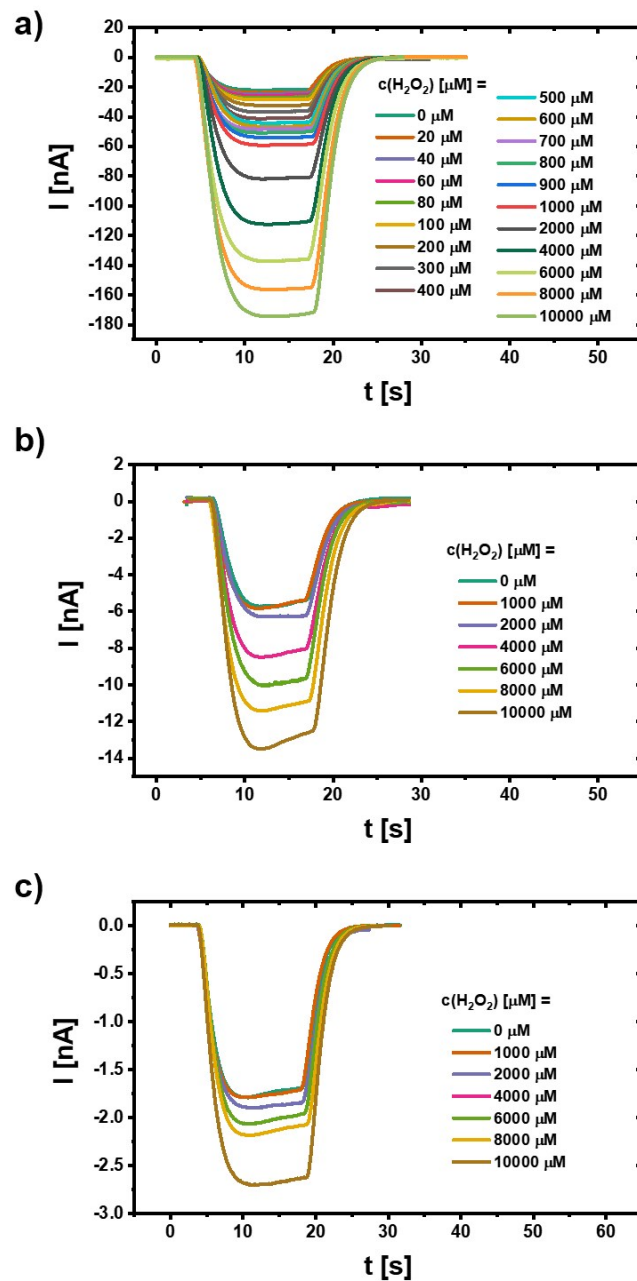

**Figure SI-23:** Transient photocurrents  $I(t)$  recorded under white light illumination at different  $H_2O_2$  concentrations  $c(H_2O_2)$  recorded on Au electrodes with  $N = 5$  layers of  $CeO_2$  NPs. The bias potentials  $U$  vs. Ag/AgCl with 3 M NaCl were a) -500 mV, b) -300 mV, and c) -100 mV.

| Method | Material                              | LOD        | Linear range    | Sensitivity                               | Reference |
|--------|---------------------------------------|------------|-----------------|-------------------------------------------|-----------|
| PEC    | Cu <sub>2</sub> O/CoP nanostructures  | 100 nM     | 20-220 $\mu$ M  | 16 mA cm <sup>-2</sup> mM <sup>-1</sup>   | 8         |
| PEC    | Au NCs                                | 2000 nM    | 30-5000 $\mu$ M | 131 nA cm <sup>-2</sup> mM <sup>-1</sup>  | 9         |
| PEC    | PbS/C <sub>3</sub> N <sub>4</sub> NPs | 1050 nM    | 10-7000 $\mu$ M | -                                         | 10        |
| PEC    | NiOOH/Pt/Si nanostructures            | 2200 nM    | 10-60 mM        | -                                         | 11        |
| PEC    | CeO <sub>2</sub> NPs                  | 27 $\mu$ M | 50-1000 $\mu$ M | 126 nA cm <sup>-2</sup> mM <sup>-1</sup>  | This work |
| PEC    | Au/CeO <sub>2</sub> NPs               | 3 $\mu$ M  | 4-2000 $\mu$ M  | 1150 nA cm <sup>-2</sup> mM <sup>-1</sup> |           |

**Table SI-4:** Comparison of the H<sub>2</sub>O<sub>2</sub> sensing performance of different methods. CNTs = carbon nanotubes. NCs = nano clusters.

## VII) Stability and interference measurements

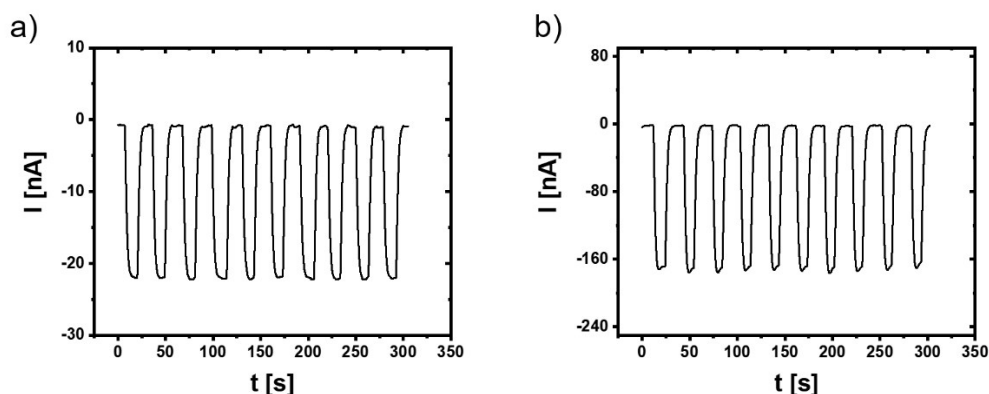

**Figure SI-24:** Measurements of the photocurrent stability  $I(t)$  within 300 s with Au electrodes with a)  $N = 5$  layers  $\text{CeO}_2$  NPs and b) 5 layers  $\text{Au/CeO}_2$  NPs, carried out in 0.01 M PBS pH 7.4 under white light illumination, with a bias  $U = -500$  mV.

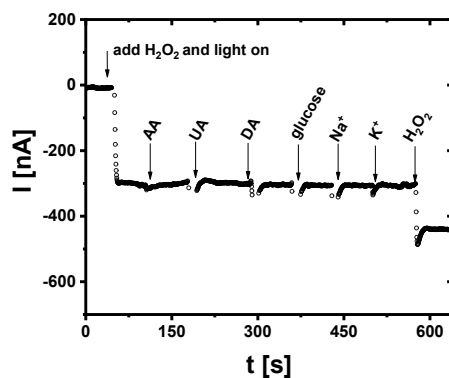

**Figure SI-25:** Photocurrent response of an Au electrode with  $N = 5$  layers  $\text{Au/CeO}_2$  NPs immersed in 0.01 M PBS (pH=7.4) upon successively adding  $\text{H}_2\text{O}_2$  (final concentration  $c(\text{H}_2\text{O}_2) = 1$  mM after addition), dopamine (DA) (final concentration 1 mM after addition), ascorbic acid (AA), uric acid (UA), glucose, NaCl and KCl (final concentration 10 mM after each addition) at  $U = -500$  mV vs. Ag/AgCl under white light illumination.

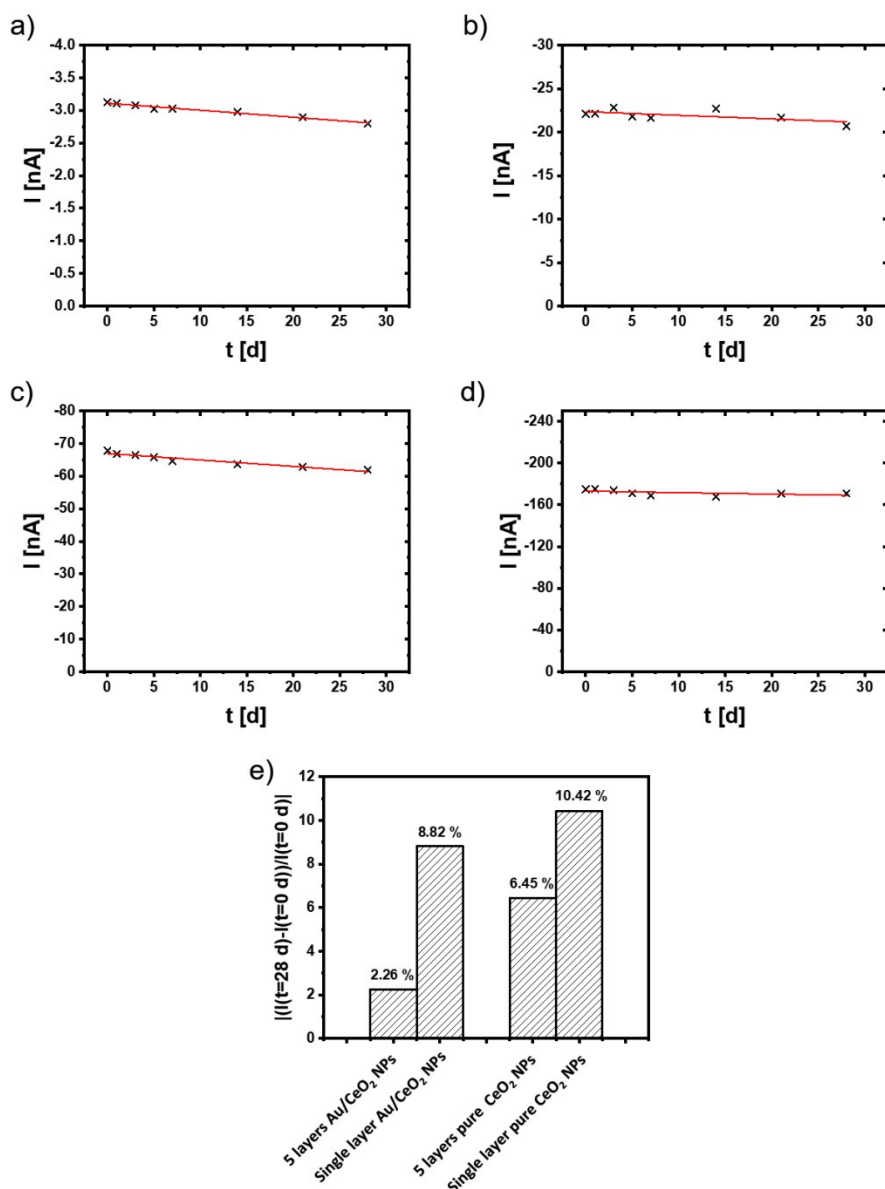

**Figure SI-26:** Verification of the storage stability of NP coated Au electrodes. The photocurrent response from Au electrodes immobilized with a)  $N = 1$  single layer  $\text{CeO}_2$  NPs, b)  $N = 5$  multilayers  $\text{CeO}_2$  NPs, c)  $N = 1$  single layer  $\text{Au/CeO}_2$  NPs, and d)  $N = 5$  multilayers  $\text{Au/CeO}_2$  NPs in 0.01 M PBS ( $\text{pH}=7.4$ ) after having stored the electrodes for the time  $t$  at 4 °C. Photocurrents were recorded at  $U = -500$  mV vs. Ag/AgCl under white light illumination. e) Percentual loss of photocurrent after  $t = 28$  days storage.

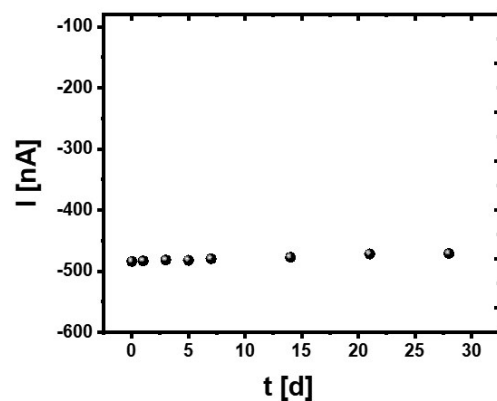

**Figure SI-27:** *Stability of photocurrent response after different storage times  $t$  (in PBS at 4 °C) of Au electrodes with  $N = 5$  layers Au/CeO<sub>2</sub> hybrid NPs in 1 mM H<sub>2</sub>O<sub>2</sub>, recorded at  $U = -500$  mV vs. Ag/AgCl under white light illumination. The 5 layers Au/CeO<sub>2</sub> electrode is storage for different time.*

## VII) References

1. N. G. Bastús, J. Piella, S. Perez, J. Patarroyo, A. Genc, J. Arbiol and V. Puntès, *Applied Materials Today*, 2019, **15**, 445-452.
2. J. Hühn, C. Carrillo-Carrion, M. G. Soliman, C. Pfeiffer, D. Valdeperez, A. Masood, I. Chakraborty, L. Zhu, M. Gallego, Y. Zhao, M. Carril, N. Feliu, A. Escudero, A. M. Alkilany, B. Pelaz, P. d. Pino and W. J. Parak, *Chem. Mater.*, 2017, **29**, 399-461.
3. M. M. O. Thotiyl, H. Basit, J. A. Sánchez, C. Goyer, L. Coche-Guerente, P. Dumy, S. Sampath, P. Labbé and J.-C. Moutet, *J. Colloid Interface Sci.*, 2012, **383**, 130-139.
4. S. Zhao, J. Völkner, M. Riedel, G. Witte, Z. Yue, F. Lisdat and W. J. Parak, *Applied Materials and Interfaces*, 2019, **11**, 21830-21839.
5. N. Sabir, N. Khan, J. Völkner, F. Widdascheck, P. d. Pino, G. Witte, M. Riedel, F. Lisdat, M. Konrad and W. J. Parak, *SMALL*, 2015, **43**, 5844-5850.
6. W. Khalid, M. E. Helou, T. Murböck, Z. Yue, J.-M. Montenegro, K. Schubert, G. Göbel, F. Lisdat, G. Witte and W. J. Parak, *ACS Nano*, 2011, **5**, 9870-9876.
7. Z. Yue, W. Khalid, M. Zanella, A. Z. Abbasi, A. Pfreundt, P. Rivera\_Gil, K. Schubert, F. Lisdat and W. J. Parak, *Anal. Bioanal. Chem.*, 2010, **396**, 1095-1103.
8. J. Tian, H. Zhu, J. Chen, X. Zheng, H. Duan, K. Pu and P. Chen, *Small*, 2017, **12**, 1700798.
9. Z. Shuang, Z. Jun, L. Zhengping, Z. Peixin and L. Yunxiao, *Microchimica Acta*, 2017, **184**, 1-10.
10. R. Li, Y. Zhang, W. Tu and Z. Dai, *ACS Appl. Mater. Interfaces*, 2017, **9**, 22289-22297.
11. H. Li, W. Hao, J. Hu and H. Wu, *Biosens. Bioelectron.*, 2013, **47**, 225-230.
